# Supplementary material
Source: Springer Nature journal article supplement (http://www.springermedizin.de/resource/supplementary/12883_2010_437_MOESM2_ESM.pdf/9455444)

**A**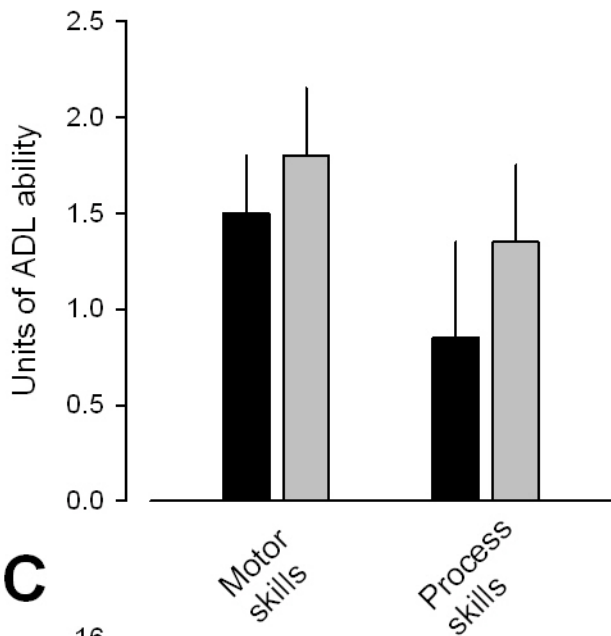**B**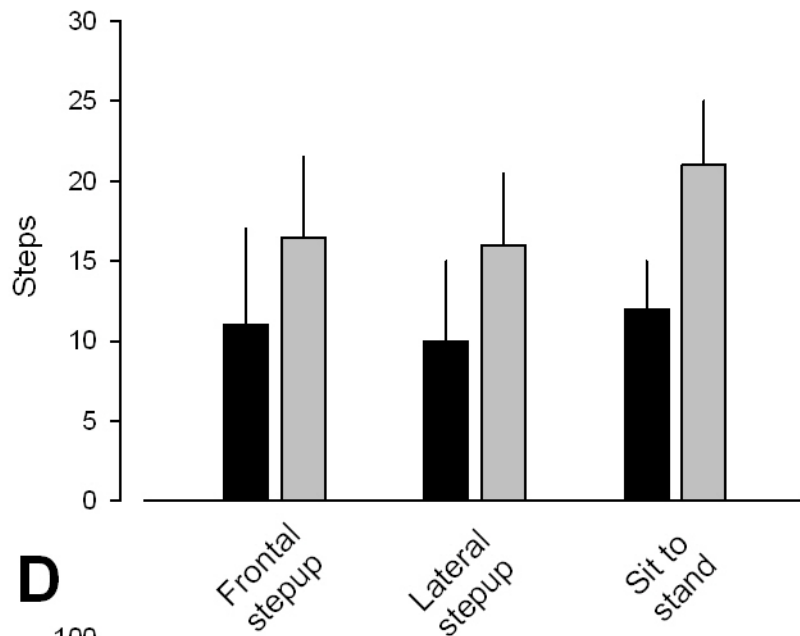**C**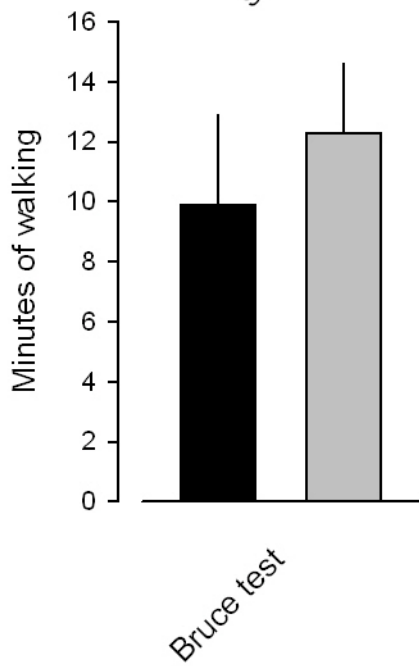**D**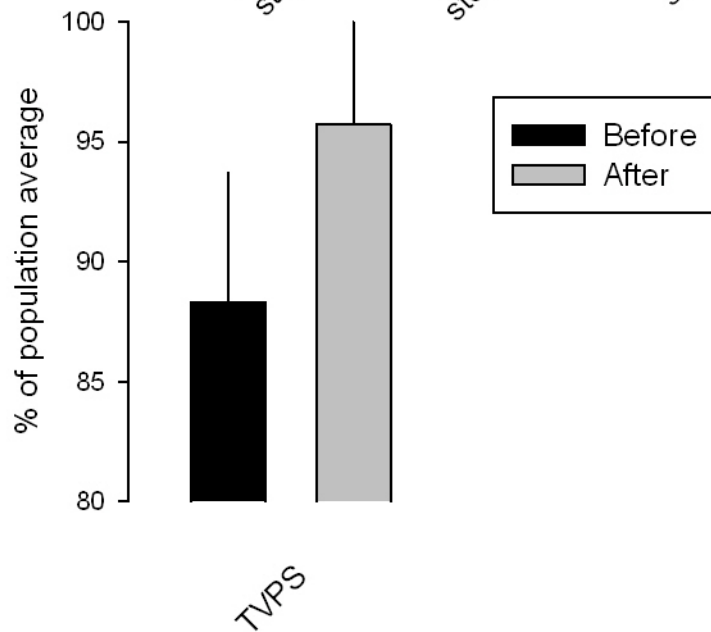

Supplement: MOESM2 [file 9455444]
